# Supplementary material for: Osteocytic Sclerostin Expression as an Indicator of Altered Bone Turnover
Source: MDPI journal article supplement (doi:10.3390/nu15030598), 2023-01-23
Supplement: s1 [file s1]

**Table S1. BONE HISTOMORPHOMETRIC PARAMETERS.**

| <b>Histomorphometric parameter (abbreviation, unit)</b>            | <b>Definition of the histomorphometric parameter</b>                                                                                                                                  |
|--------------------------------------------------------------------|---------------------------------------------------------------------------------------------------------------------------------------------------------------------------------------|
| <b>Static parameters</b>                                           |                                                                                                                                                                                       |
| Bone area (B.Ar, %)                                                | Percentage of tissue area, consisting of trabecular bone tissue (mineralized bone and osteoid)                                                                                        |
| Osteoid area (O.Ar, %)                                             | Percentage of bone area consisting of osteoid                                                                                                                                         |
| Osteoid perimeter (O.Pm, %)                                        | Percentage of total bone perimeter covered by osteoid                                                                                                                                 |
| Osteoid width (O.Wi, $\mu\text{m}$ )                               | Average width of the osteoid seams                                                                                                                                                    |
| Osteoblast perimeter to osteoid perimeter (Ob.Pm.O, %)             | Percentage of the osteoid perimeter covered by active osteoblasts                                                                                                                     |
| Osteoblast perimeter to total perimeter (Ob.Pm.T, %)               | Percentage of the total bone perimeter covered by active osteoblasts                                                                                                                  |
| Eroded perimeter (E.Pm, %)                                         | Percentage of the total bone perimeter that has been eroded by osteoclasts                                                                                                            |
| Osteoclast perimeter to eroded perimeter (Oc.Pm.E, %)              | Percentage of the eroded perimeter covered by resorbing osteoclasts                                                                                                                   |
| Osteoclast perimeter to total perimeter (Oc.Pm.T, %)               | Percentage of the total bone perimeter covered by resorbing osteoclasts                                                                                                               |
| <b>Dynamic parameters</b>                                          |                                                                                                                                                                                       |
| Bone formation rate (BFR, $\mu\text{m}^2/\text{mm}^2/\text{day}$ ) | Area of bone, formed per unit of time, and existing bone                                                                                                                              |
| Mineral apposition rate (MAR, $\mu\text{m}/\text{day}$ )           | The rate by which osteoid is mineralized (average distance between the midpoints of two tetracycline labels, divided by the time interval between the administration of these labels) |
| Adjusted apposition rate (Aj.AR, $\mu\text{m}/\text{day}$ )        | The mineral apposition rate, averaged over the entire osteoid surface                                                                                                                 |
| Mineralization lag time (Mlt, days)                                | Time interval between the deposition of the osteoid and its subsequent mineralization, averaged over the entire life span of the osteoid seam                                         |
| Osteoid maturation time (Omt, days)                                | Time interval between the onset of matrix deposition and the onset of mineralization at each bone-forming site                                                                        |

Based on standardized nomenclature, symbols and units for bone histomorphometry, as published by Dempster et al. [32].

**Table S2. HISTOMORPHOMETRIC PARAMETERS OF THE (NON-)PTX RATS**

| <b>Parameter (unit)</b>                        | <b>PTX, N=10</b> | <b>non-PTX, N=9</b> | <b>p-value</b> |
|------------------------------------------------|------------------|---------------------|----------------|
| BFR ( $\mu\text{m}^2/\text{mm}^2/\text{day}$ ) | 183.62 (253.16)  | 153.84 (64.80)      | 0.491          |
| B.Ar (%)                                       | 0.28 (0.072)     | 0.27 (0.069)        | 1.000          |
| O.Ar (%)                                       | 0.0031 (0.0059)  | 0.0031 (0.0034)     | 0.321          |
| O.Pm (%)                                       | 0.028 (0.064)    | 0.040 (0.044)       | 0.481          |
| O.Wi ( $\mu\text{m}$ )                         | 3.01 (0.55)      | 2.74 (0.25)         | 0.370          |
| Ob.Pm.O (%)                                    | 0.30 (0.19)      | 0.27 (0.10)         | 0.423          |
| Ob.Pm.T (%)                                    | 0.0087 (0.032)   | 0.011 (0.013)       | 0.383          |
| E.Pm (%)                                       | 0.015 (0.010)    | 0.0062 (0.0064)     | 0.805          |
| Oc.Pm.E (%)                                    | 0.27 (0.079)     | 0.21 (0.047)        | 0.093          |
| Oc.Pm.T (%)                                    | 0.0041 (0.0026)  | 0.0014 (0.0014)     | 0.200          |
| MAR ( $\mu\text{m}/\text{day}$ )               | 2.29 (0.62)      | 1.77 (0.70)         | 0.282          |
| Aj.AR ( $\mu\text{m}/\text{day}$ )             | 0.90 (0.56)      | 0.89 (0.79)         | 1.000          |
| Mlt (days)                                     | 3.17 (6.49)      | 3.17 (4.64)         | 1.000          |
| Omt (days)                                     | 1.25 (0.40)      | 1.49 (0.52)         | 0.573          |

Abbreviations: see Table A1. Data shown as median (IQR).
